# Supplementary material
Source: PubMed Central journal article supplement (PMC6948772)
Supplement: jciinsight-4-130508-s264.pdf [file jciinsight-4-130508-s264.pdf]

## TABLE OF CONTENTS SUPPLEMENTAL MATERIAL

|                         |                                                                                                                                                                                                                                                                          |
|-------------------------|--------------------------------------------------------------------------------------------------------------------------------------------------------------------------------------------------------------------------------------------------------------------------|
| Supplemental Table 1    | Antibodies used for flow cytometry                                                                                                                                                                                                                                       |
| Supplemental Table 2    | Primer sequences                                                                                                                                                                                                                                                         |
| Supplemental Table 3    | Measured parameters after low salt diet and after high salt diet in <i>study II</i> .                                                                                                                                                                                    |
| Supplemental Figure 1   | Pilot experiments comparing anti-CD163 with anti-CD68                                                                                                                                                                                                                    |
| Supplemental Figure 2   | Effect of high salt diet on monocyte markers                                                                                                                                                                                                                             |
| Supplemental Figure 3-4 | Effect of salt on macrophages <i>in vitro</i> , in which the macrophages were differentiated for 7 days in the presence of high salt (whereas Figure 6 in the main text shows the results of salt stimulation after differentiation <i>without</i> any high salt medium) |

**Supplemental Table 1: Antibodies used for flow cytometry.**

| <b>Marker</b>   | <b>Label</b> | <b>Dilution</b> | <b>Clone</b>   | <b>Supplier</b> |
|-----------------|--------------|-----------------|----------------|-----------------|
| CD14            | PE-Cy7       | 1/50            | M5E2           | BD              |
| CD16            | APC-Cy7      | 1/50            | 3G8            | BD              |
| HLA-DR          | PerCp-Cy5.5  | 1/50            | G46-6          | BD              |
| CCR2            | APC          | 1/50            | 48607          | BD              |
| CD206           | FITC         | 1/25            | 15-2           | Sony            |
| CCR7            | PE           | 1/25            | G043H7         | Biolegend       |
| CCR5            | FITC         | 1/10            | 2D7/CCR5       | BD              |
| CX3CR1          | PE           | 1/50            | 2A9-1          | Biolegend       |
| CD86            | FITC         | 1/25            | IT2.2          | Biolegend       |
| CD45RA          | APC          | 1/100           | HI100          | BD              |
| TLR-4           | PE           | 1/25            | HTA125         | Biolegend       |
| CD32            | FITC         | 1/10            | FLI8.26 (2003) | BD              |
| CD36            | APC          | 1/25            | CB38           | BD              |
| CD64            | APC          | 1/50            | 10,1           | Biolegend       |
| SRA             | PE           | 1/10            | 351615         | R&D             |
| CD163           | APC          | 1/25            | RM3/1          | Biolegend       |
| CD200R          | PE           | 1/25            | OX-108         | Biolegend       |
| CD18            | APC          | 1/50            | 6,7            | BD              |
| CD11c           | APC          | 1/10            | B-ly6          | BD              |
| CD29            | APC          | 1/10            | MAR4           | BD              |
| CD49d           | FITC         | 1/25            | 9F10           | BD              |
| CD11b           | PE           | 1/25            | ICRF44         | BD              |
| CD62L           | PE           | 1/50            | DREG-56        | BD              |
| Mouse IgG1k     | FITC/PE/APC  | 1/50            | MOPC-21        | BD              |
| isotype control |              |                 |                |                 |

APC, allophycocyanin. CD, cluster of differentiation. CR, chemokine receptor. Cy, CyChrome. FITC, Fluorescein isothiocyanate. HLA, human leucocyte antigen. PE, Phycoerythrin. PerCP, peridinin-chlorophyll-protein. SR, scavenger receptor.

**Supplemental Table 2.** Primer sequences.

| <b>Gene</b> | <b>Forward</b>            | <b>Reverse</b>          |
|-------------|---------------------------|-------------------------|
| CD200R      | TGGATGAAAAACAGATTACACAGAA | TAATGCGATAGGAGGGCAAC    |
| CCL22       | CCTACTCTGATGACCGTGGC      | AGGGAATGCAGAGAGTTGGC    |
| CCL24       | CACATCATCCCTACGGGCTC      | GGTAGCTGACCACTCGGTTC    |
| CCR2        | CCACATCTCGTTCTCGGTTTATC   | CAGGGAGCACCGTAATCATAATC |
| CD206       | CACCATCGAGGAATTGGACT      | ACAATTCGTCATTTGGCTCA    |
| CLEC10A     | GAACGGCAGGCAGTTCATTC      | AGGCTTCCTCACCATTGTTGT   |
| FCER2       | CCAGGAATTGAACGAGAGGAAC    | TTGATCCACTTTTCAGGGCAC   |
| GNB2L1      | GAGTGTGGCCTTCTCCTCTG      | GCTTGCAGTTAGCCAGGTTC    |
| HPRT1       | GACCAGTCAACAGGGGACAT      | AACACTTCGTGGGGTCCTTTTC  |
| SOCS1       | TCTCACCTCTTGAGGGGGTC      | AGAGGTAGGAGGTGCGAGTT    |
| TGM2        | ATAAGTTAGCGCCGCTCTCC      | CTCTCTAAGACCAGCTCCTCG   |

**Supplemental Table 3.** Measured parameters after low salt diet and after high salt diet in *study II*. Data are presented as mean (SD). BP, blood pressure. MAP, mean arterial pressure. eGFR, estimated glomerular filtration rate.

| <b>Healthy males (n=12)</b> |               |               |                |
|-----------------------------|---------------|---------------|----------------|
|                             | <b>LSD</b>    | <b>HSD</b>    | <b>p-value</b> |
| Weight (kg)                 | 74.0 (6.6)    | 76.5 (6.7)    | <0.001         |
| <b>Plasma</b>               |               |               |                |
| Sodium (mmol/L)             | 137.5 (1.6)   | 140.3 (1.8)   | <0.01          |
| Potassium (mmol/L)          | 3.9 (0.3)     | 3.9 (0.2)     | 0.76           |
| Chloride (mmol/L)           | 99.6 (1.5)    | 103.3 (2.0)   | <0.001         |
| Bicarbonate (mmol/L)        | 25.5 (2.0)    | 25.4 (1.6)    | 0.88           |
| Creatinine (umol/L)         | 83.9 (10.0)   | 77.0 (9.2)    | <0.001         |
| eGFR (CKD-EPI)              | 111.7 (14.1)  | 119.9 (11.7)  | <0.01          |
| Osmolality (mosm/kg)        | 284.9 (3.1)   | 289.6 (3.8)   | <0.01          |
| Glucose (mmol/L)            | 4.9 (0.3)     | 5.0 (0.4)     | 0.70           |
| <b>24h urine</b>            |               |               |                |
| Volume (ml/24h)             | 1702 (551)    | 1909 (544)    | 0.24           |
| Osmolality (mosm/kg)        | 430.9 (164.4) | 743.7 (164.8) | <0.001         |
| Creatinine (mmol/24h)       | 15.8 (2.4)    | 17.3 (2.5)    | <0.05          |
| Sodium (mmol/24h)           | 19.1 (9.5)    | 340.8 (104)   | <0.001         |

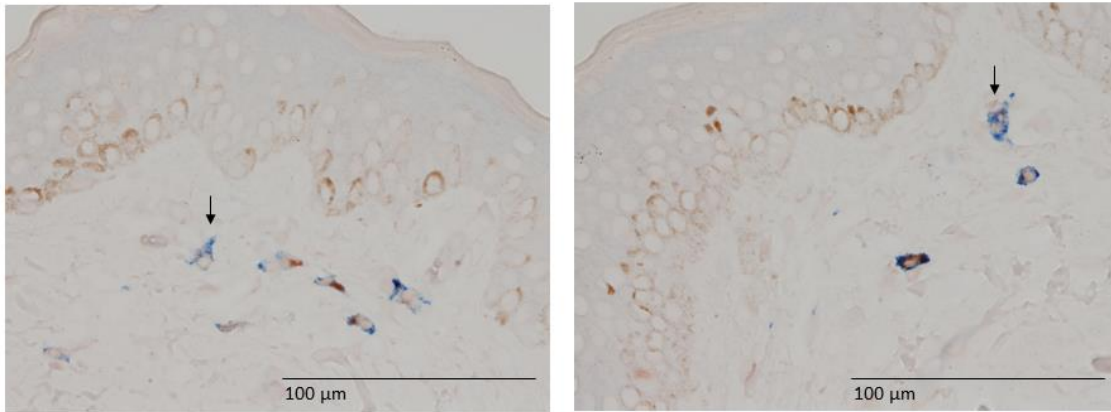

**Supplemental Figure 1. Immunohistochemical staining with anti-CD68 and anti-CD163 in human skin.**

Anti-CD163 (blue) repeatedly proved to be more abundant than anti-CD68 (red). In some areas anti-CD68 staining was absent, but clearly a staining for anti-CD163 was present; examples of such regions are indicated by the black arrow heads.

**A**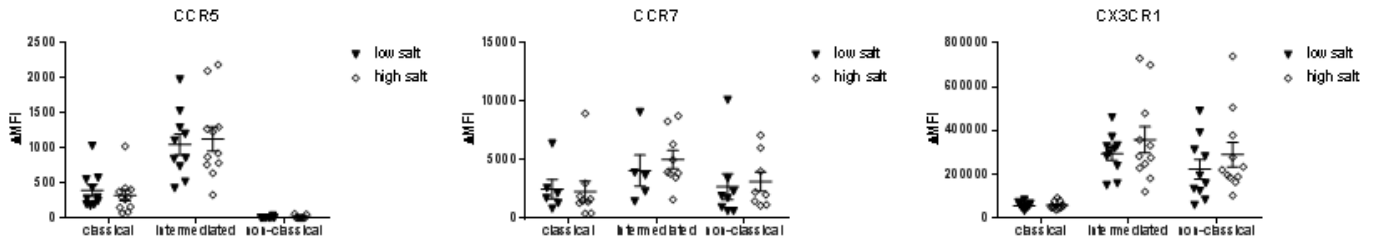**B**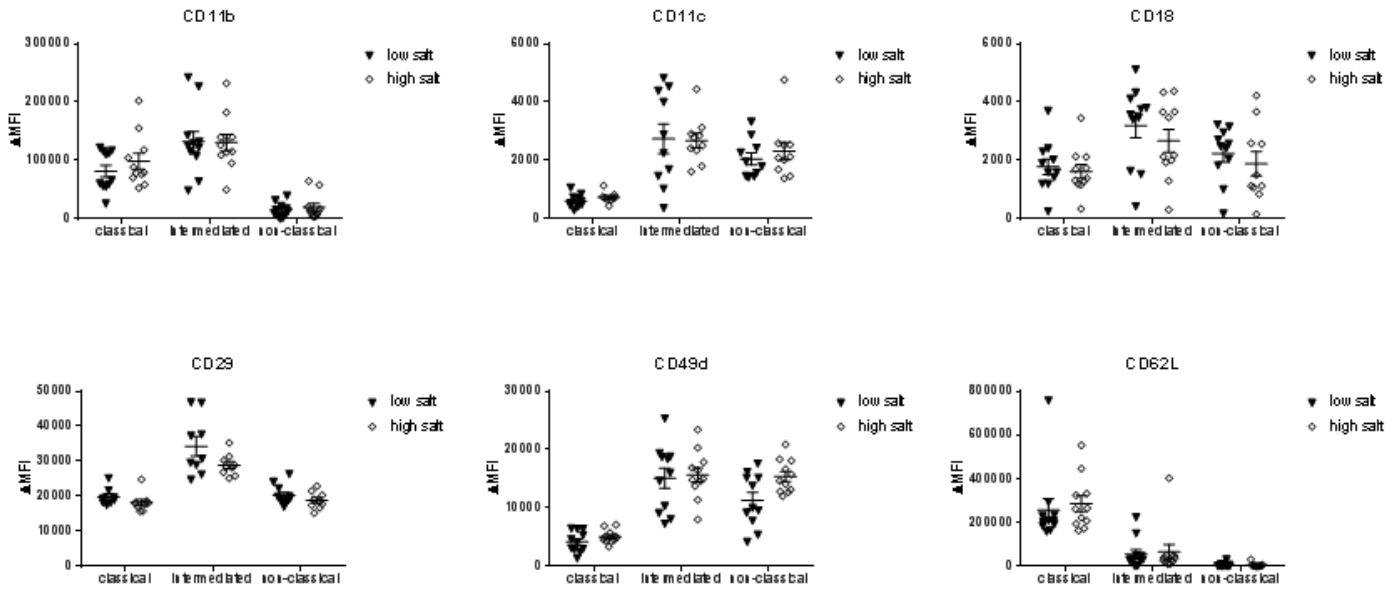**C**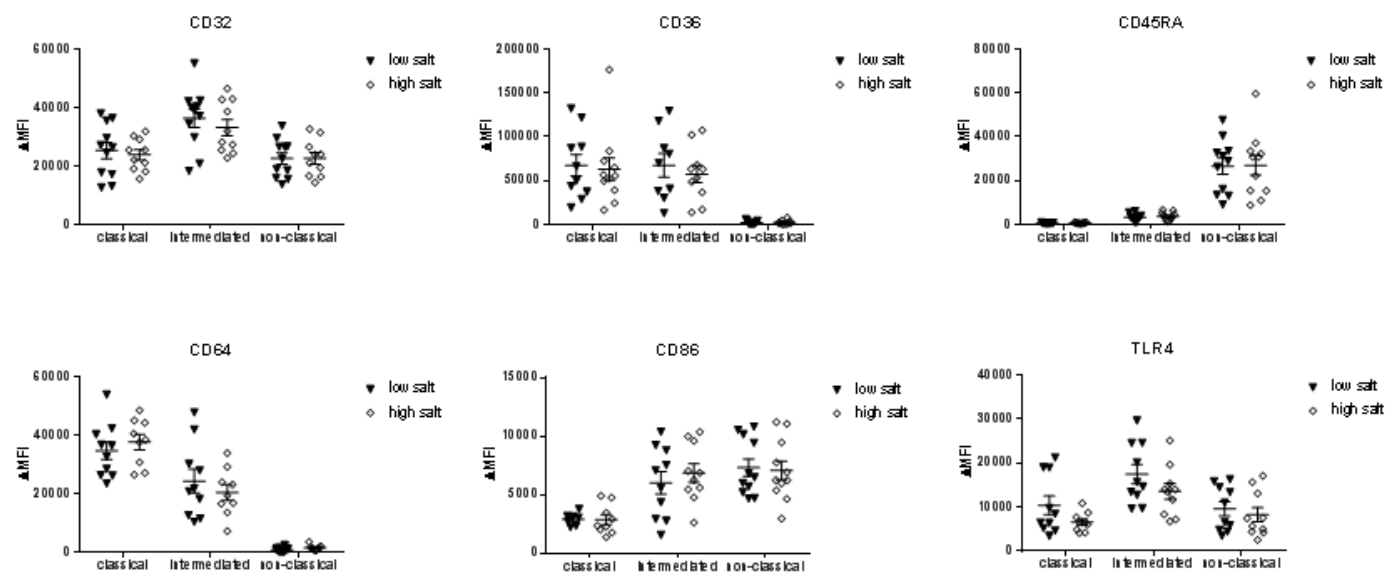**D**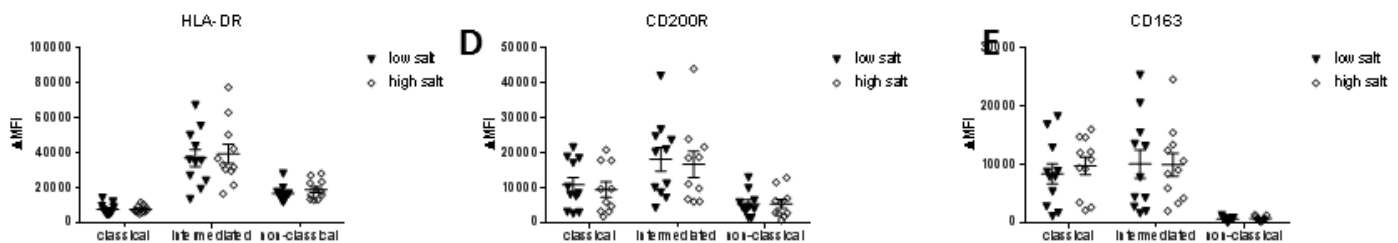

**Supplemental figure 2. Effects of a HSD on monocyte chemokine receptors, adhesion molecules, activation molecules, M2-associated markers, and scavenger receptors.**

The expression of various surface markers on the monocyte subsets was calculated as  $\Delta\text{MFI} = [\text{median fluorescence intensity}]_{\text{positive staining}} - [\text{median fluorescence intensity}]_{\text{isotype control}}$ .

(A) HSD has no effect on monocyte chemokine receptors CCR5, CCR7, and CX3CR1. (B) HSD has no effect on monocyte adhesion molecules CD11b, CD11c, CD18, CD29, CD49d, and CD62L. (C) HSD has no effect on monocyte activation molecules CD32, CD36, CD45RA, CD64, CD86, TLR4, and HLA-DR. (D) HSD has no effect on monocyte M2-associated marker CD200R. (E) HSD has no effect on monocyte scavenger receptor SRA. HSD, high salt diet.

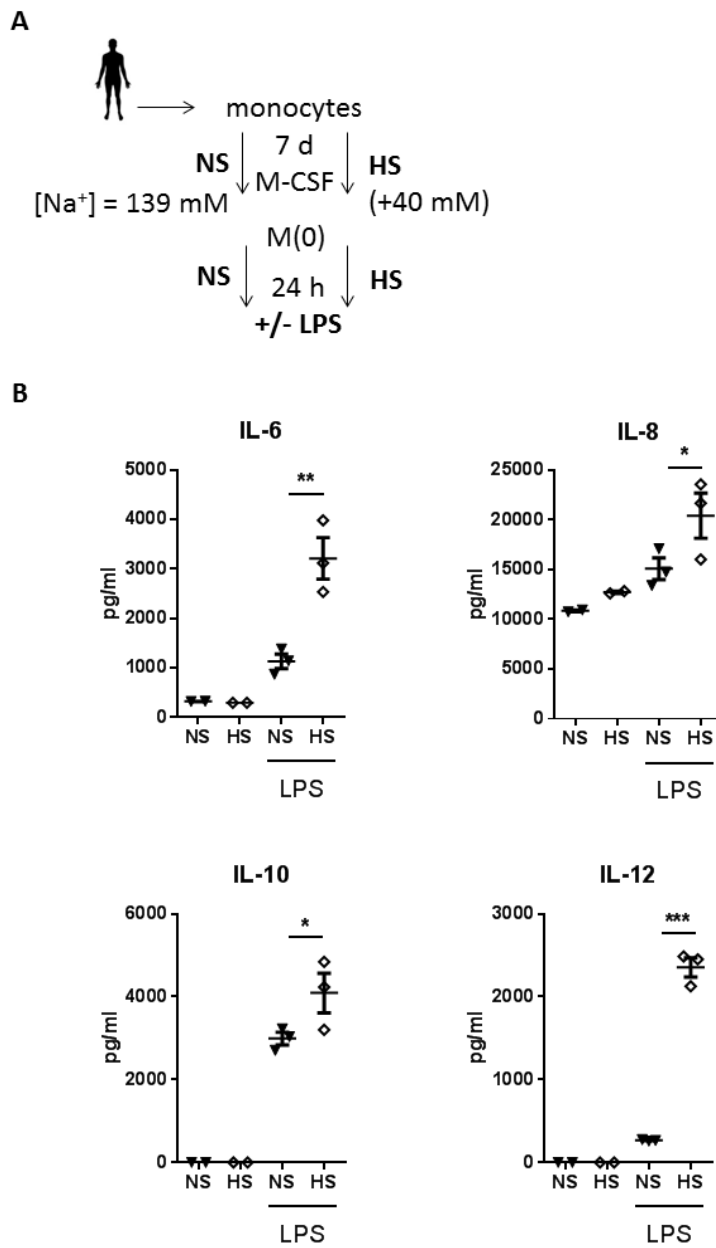

**Supplemental figure 3. High salt boosts LPS-induced cytokine secretion in macrophages *in vitro*.**

(A) Schematic overview of *in vitro* stimulation of macrophages. (B) HS increases secretion of IL-6, IL-8, IL-10 and IL-12 upon LPS exposure.



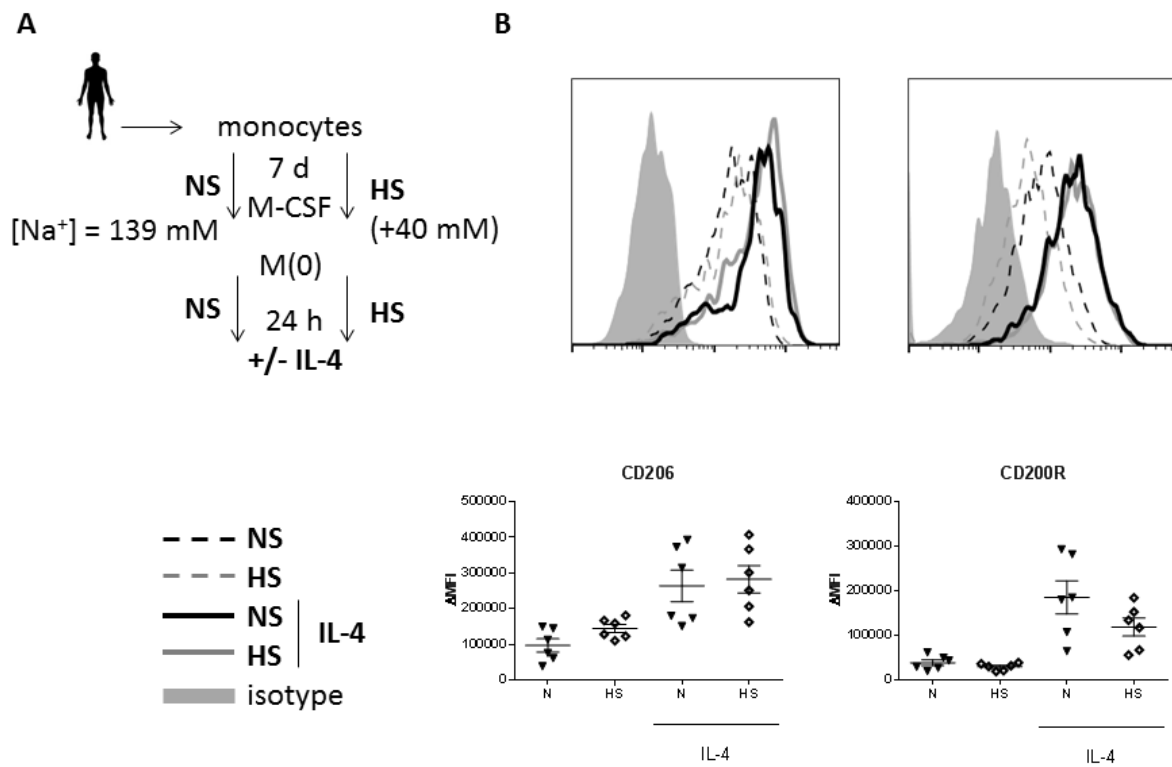

**Supplemental figure 4. High salt does not reduce IL-4 stimulated surface expression of CD206 and CD200R in macrophages *in vitro*.** (A) Schematic overview of *in vitro* stimulation of macrophages. (B) HS does not reduce surface expression of CD206 and CD200R.
